# Supplementary material for: Novel heterobimetallic Ir(iii)–Re(i) complexes: design, synthesis and antitumor mechanism investigation
Source: Royal Society of Chemistry journal article supplement (doi:10.1039/d2dt00719c), 2022-01-01
Supplement: d2dt00719c1.pdf [file d2dt00719c1.pdf]

## Supporting Information

### **Novel heterobimetallic Ir(III)-Re(I) complexes: design, synthesis and antitumor mechanism investigation**

**Jun-Jian Lu,<sup>a</sup> Xiu-Rong Ma,<sup>a</sup> Kai Xie,<sup>a</sup> Pei-Xin Yang,<sup>a</sup> Rong-Tao  
Li<sup>\*a</sup> and Rui-Rong Ye<sup>\*a</sup>**

*<sup>a</sup> Faculty of Life Science and Technology, Kunming University of Science and  
Technology, Kunming 650500, P. R. China*

\*Corresponding author.

E-mail addresses: rongtaolikm@163.com (R.-T. Li), [yerr@mail2.sysu.edu.cn](mailto:yerr@mail2.sysu.edu.cn) (R.-R.  
Ye).

**Scheme S1** Synthetic routes of **IrRe-1-3**.

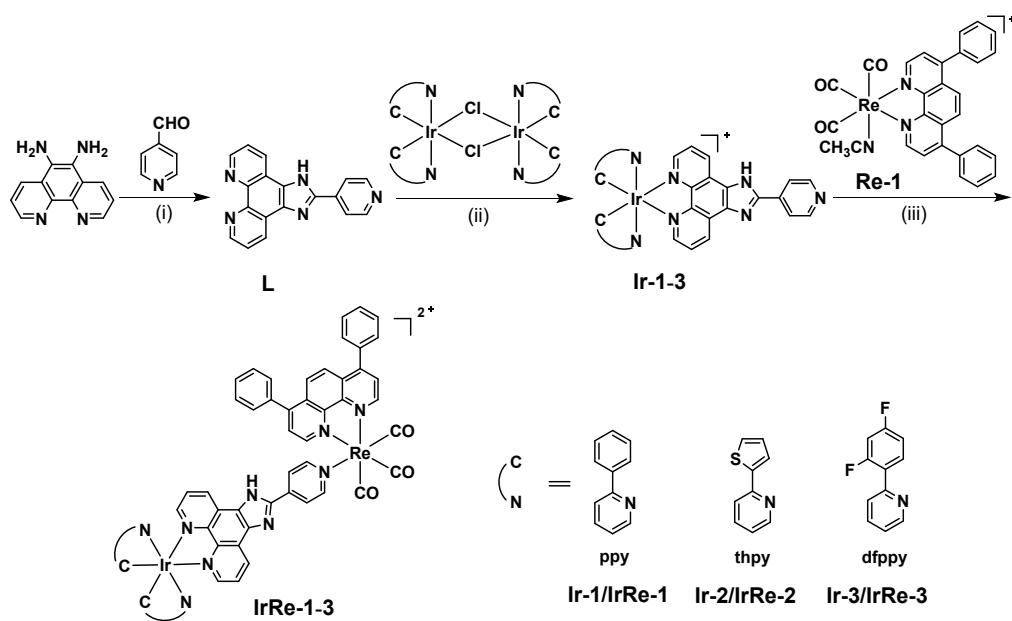

Condition: (i) CH<sub>3</sub>CH<sub>2</sub>OH, reflux, 24 h;  
(ii) MeOH/CH<sub>2</sub>Cl<sub>2</sub>, N<sub>2</sub>, 55 °C, 5 h;  
(iii) acetone, N<sub>2</sub>, 24 h.

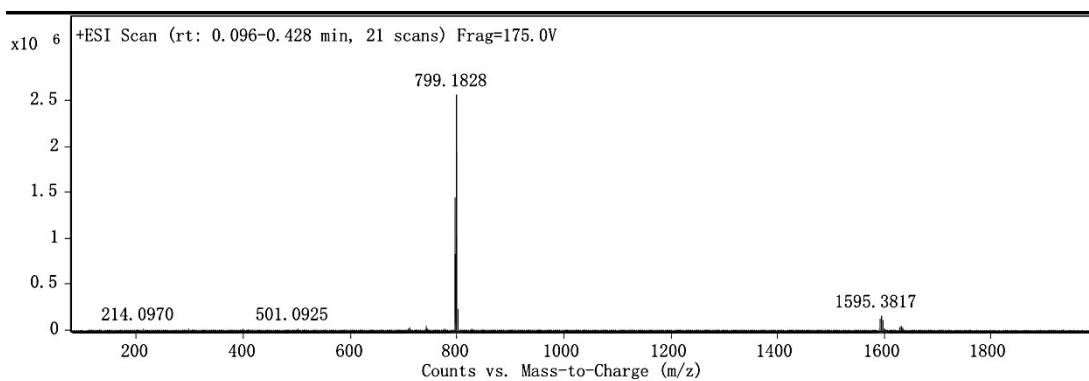

**Fig. S1** ESI-MS characterization of **Ir-1**, 799.1828 [M-PF<sub>6</sub>]<sup>+</sup>.

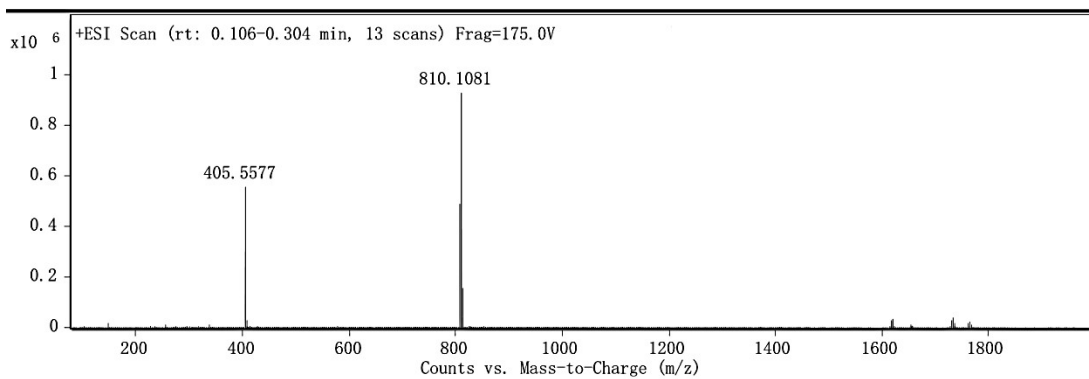

**Fig. S2** ESI-MS characterization of **Ir-2**, 405.5577 [M-PF<sub>6</sub>+H]<sup>2+</sup>, 810.1081 [M-PF<sub>6</sub>]<sup>+</sup>.

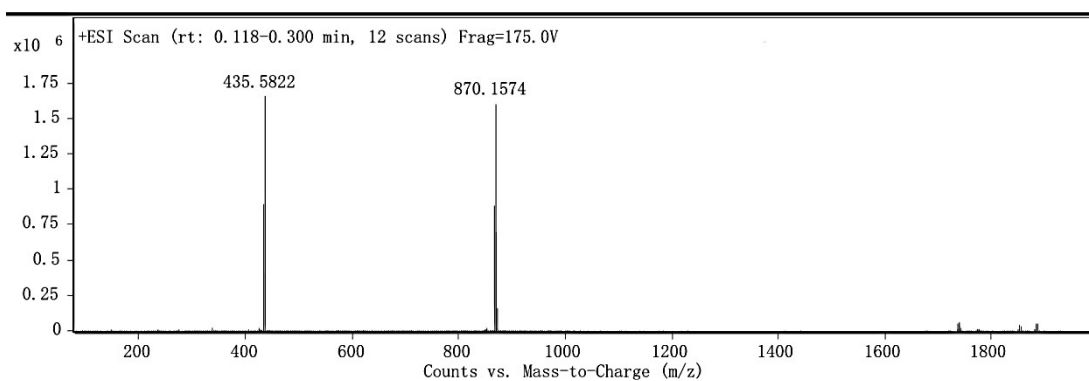

**Fig. S3** ESI-MS characterization of **Ir-3**, 435.5822 [M-PF<sub>6</sub>+H]<sup>2+</sup>, 870.1574 [M-PF<sub>6</sub>]<sup>+</sup>.

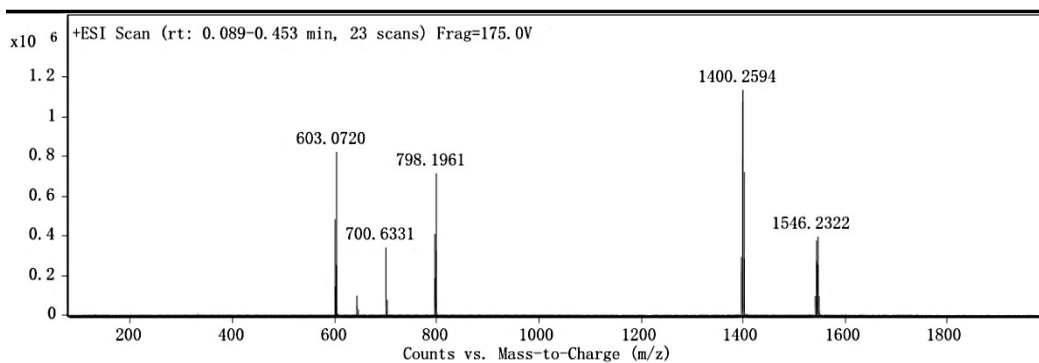

**Fig. S4** ESI-MS characterization of **IrRe-1**, 603.0720 [M-L-Ir(ppy)<sub>2</sub>-2PF<sub>6</sub>]<sup>+</sup>, 700.6331 [M-2PF<sub>6</sub>]<sup>2+</sup>, 798.1961 [M-Re(DIP)(CO)<sub>3</sub>-2PF<sub>6</sub>]<sup>+</sup>, 1400.2591 [M-2PF<sub>6</sub>-H]<sup>+</sup>, 1546.2322 [M-PF<sub>6</sub>]<sup>+</sup>.

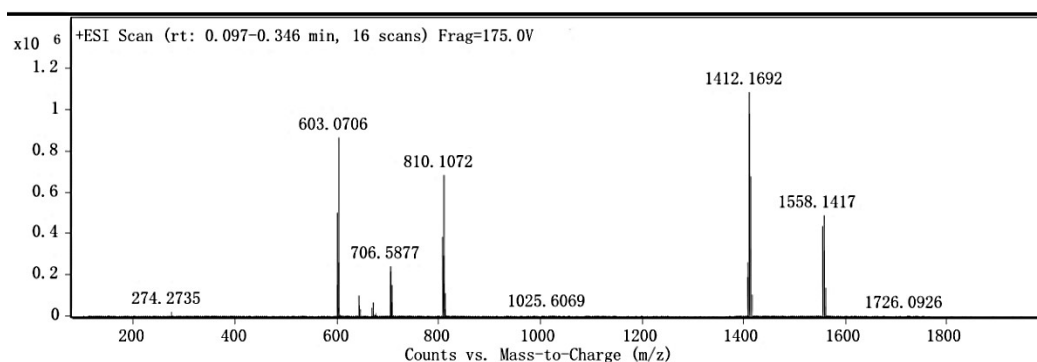

**Fig. S5** ESI-MS characterization of **IrRe-2**, 603.0706 [M-L-Ir(thpy)<sub>2</sub>-2PF<sub>6</sub>]<sup>+</sup>, 706.5877 [M-2PF<sub>6</sub>]<sup>2+</sup>, 810.1072 [M-Re(DIP)(CO)<sub>3</sub>-2PF<sub>6</sub>]<sup>+</sup>, 1412.1692 [M-2PF<sub>6</sub>-H]<sup>+</sup>, 1558.1417 [M-PF<sub>6</sub>]<sup>+</sup>.

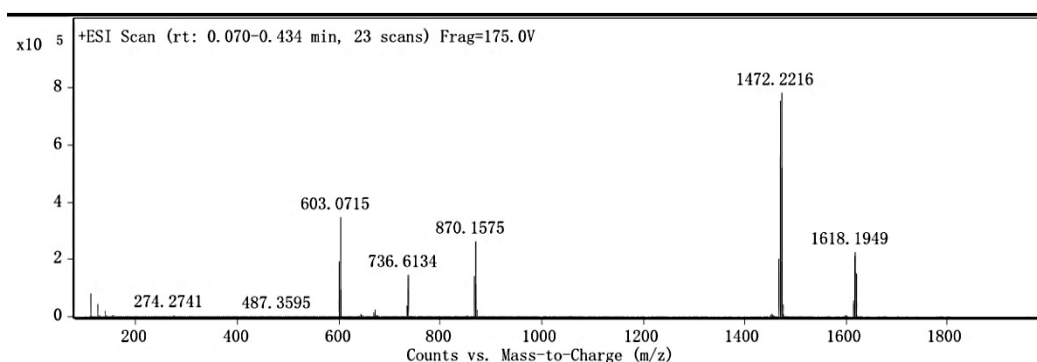

**Fig. S6** ESI-MS characterization of **IrRe-3**, 603.0715 [M-L-Ir(dfppy)<sub>2</sub>-2PF<sub>6</sub>]<sup>+</sup>, 736.6134 [M-2PF<sub>6</sub>]<sup>2+</sup>, 870.1575 [M-Re(DIP)(CO)<sub>3</sub>-2PF<sub>6</sub>]<sup>+</sup>, 1472.2216 [M-2PF<sub>6</sub>-H]<sup>+</sup>, 1618.1949 [M-PF<sub>6</sub>]<sup>+</sup>.

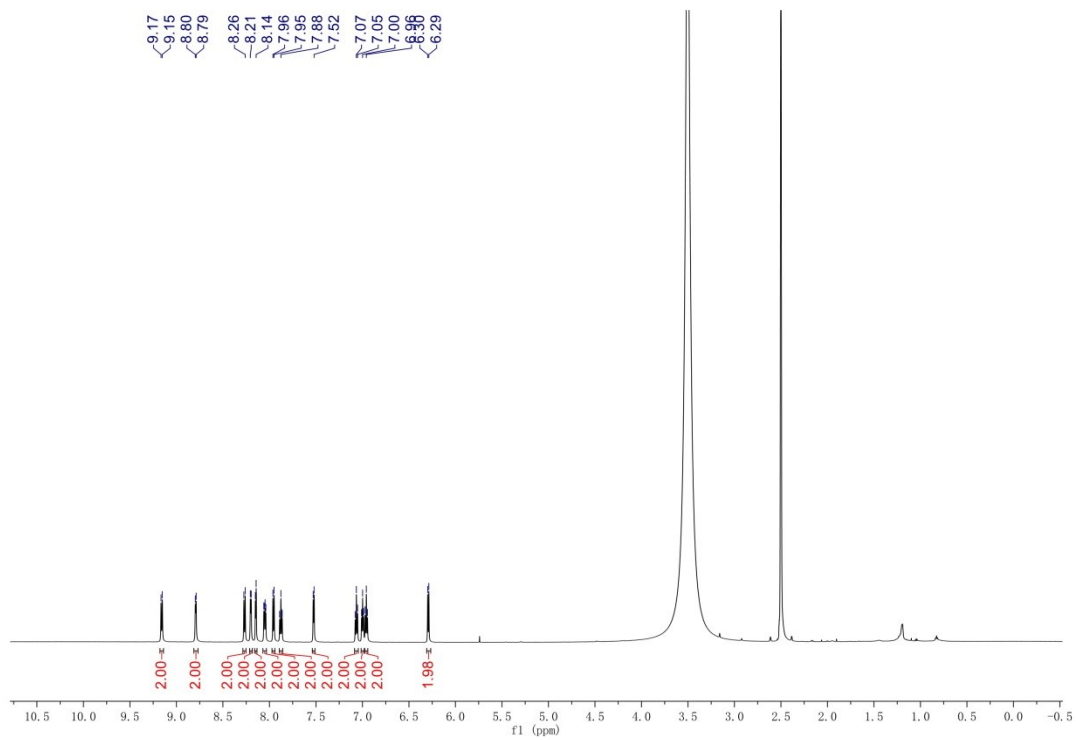

**Fig. S7**  $^1\text{H}$  NMR spectrum of **Ir-1**.

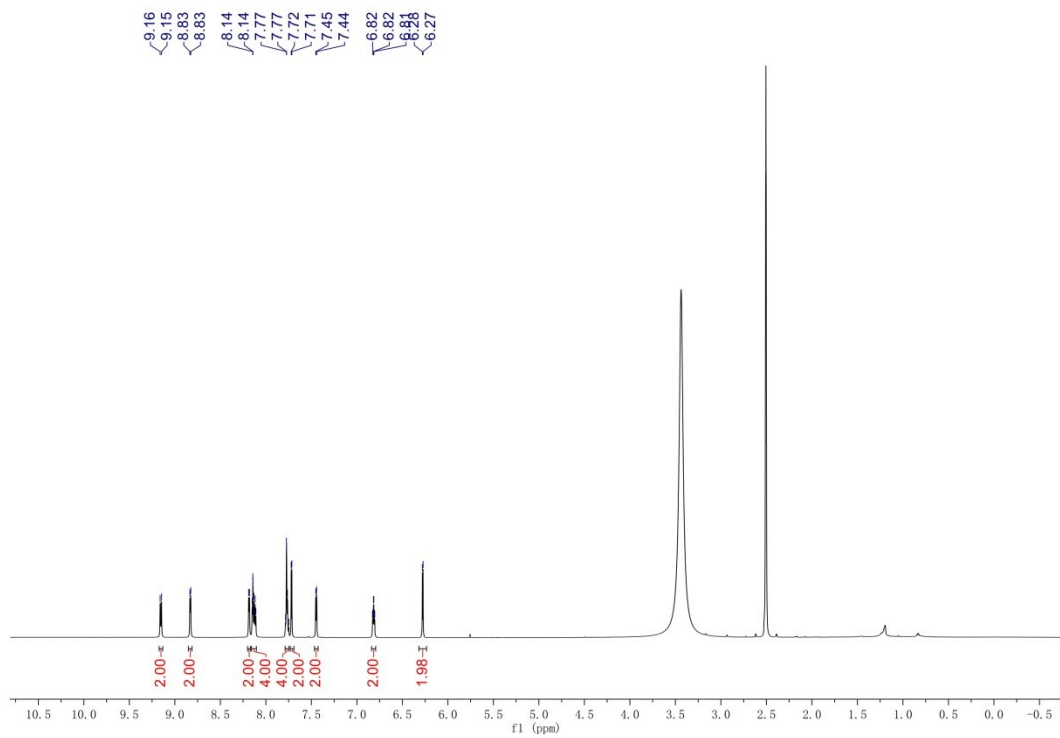

**Fig. S8**  $^1\text{H}$  NMR spectrum of **Ir-2**.

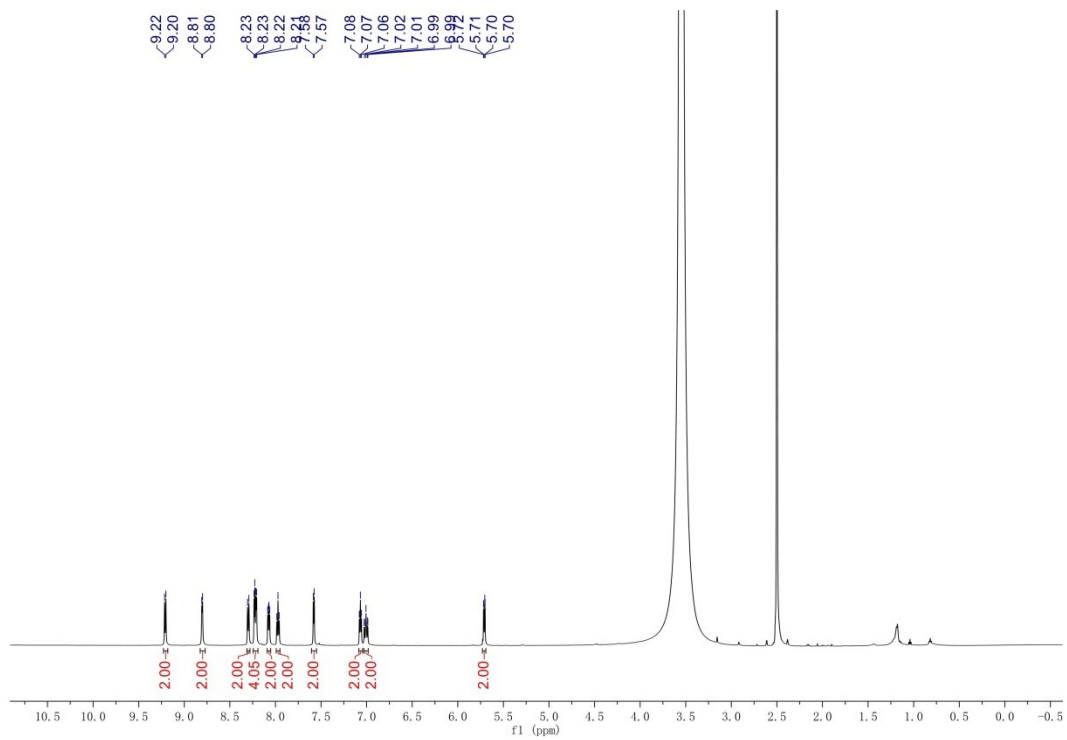

**Fig. S9**  $^1\text{H}$  NMR spectrum of **Ir-3**.

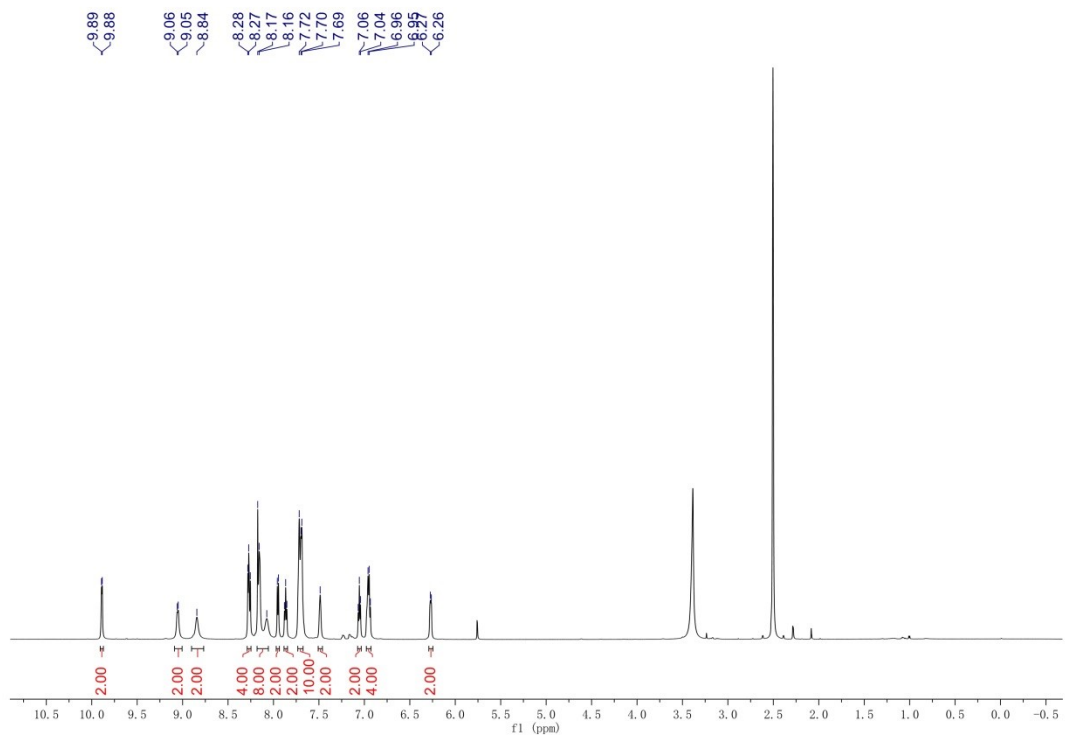

**Fig. S10**  $^1\text{H}$  NMR spectrum of **IrRe-1**.

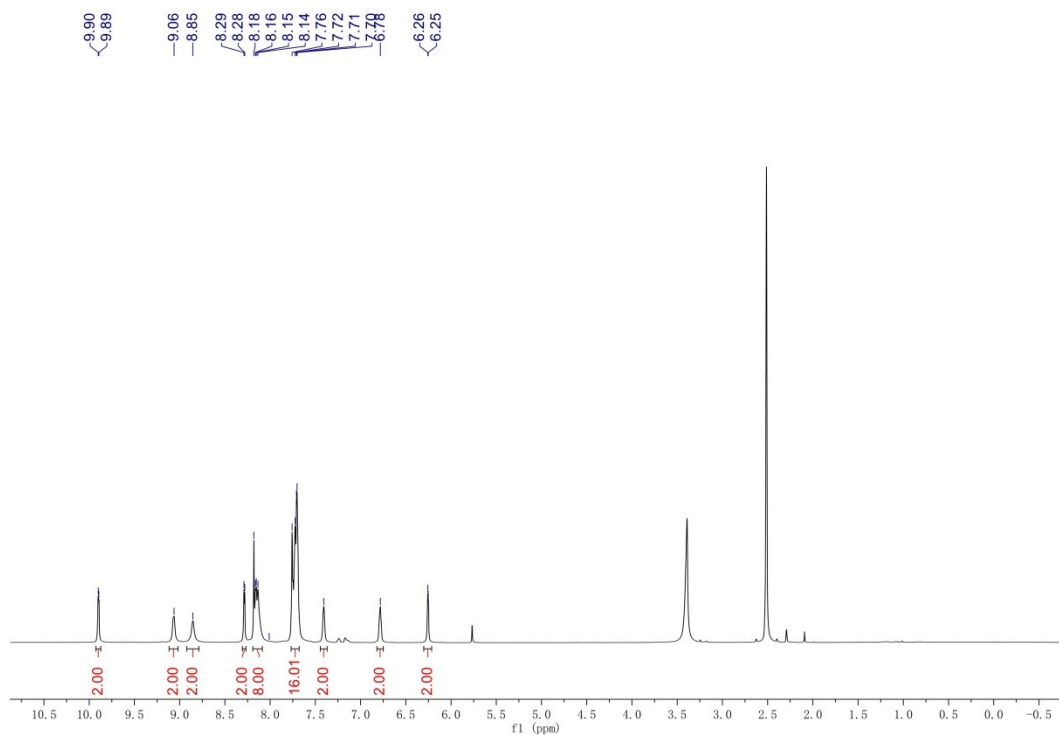

**Fig. S11**  $^1\text{H}$  NMR spectrum of **IrRe-2**.

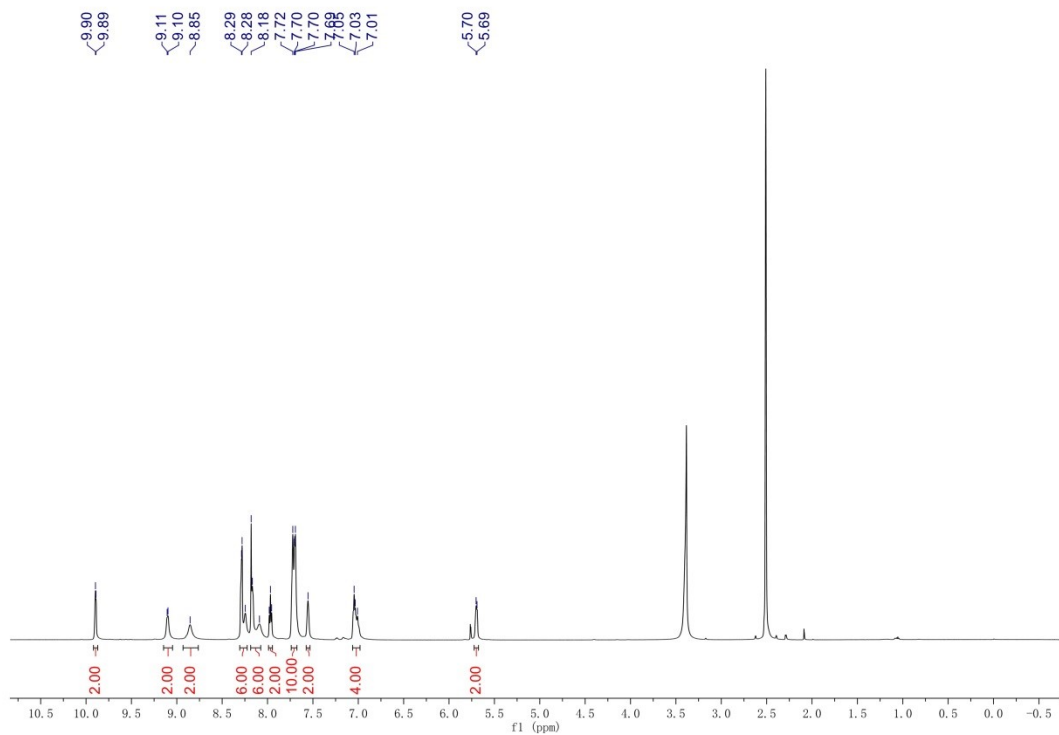

**Fig. S12**  $^1\text{H}$  NMR spectrum of **IrRe-3**.

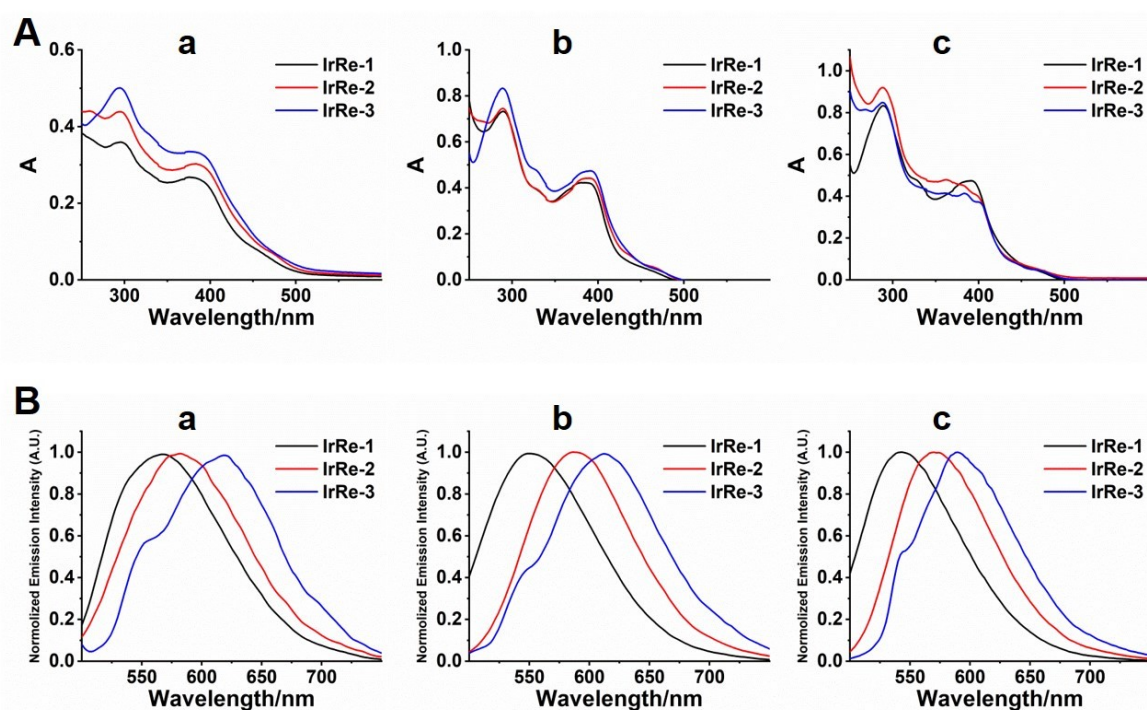

**Fig. S13** (A) UV/Vis spectra ( $1 \times 10^{-5}$  M) of **IrRe-1-3** measured in PBS (a), CH<sub>3</sub>CN (b) and CH<sub>2</sub>Cl<sub>2</sub> (c) at 298 K. (B) Emission spectra ( $1 \times 10^{-5}$  M) of **IrRe-1-3** measured in PBS (a), CH<sub>3</sub>CN (b) and CH<sub>2</sub>Cl<sub>2</sub> (c) at 298 K ( $\lambda_{\text{ex}} = 405$  nm).

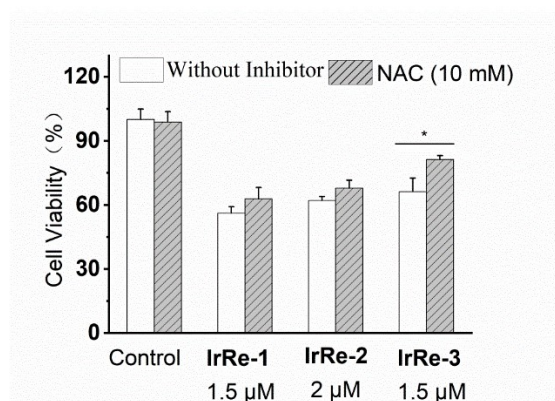

**Fig. S14** Cell viability of HeLa cells treated with **IrRe-1-3** in the presence or absence of NAC for 48 h. (\*  $P < 0.05$ , as compared with the group without NAC treatment).



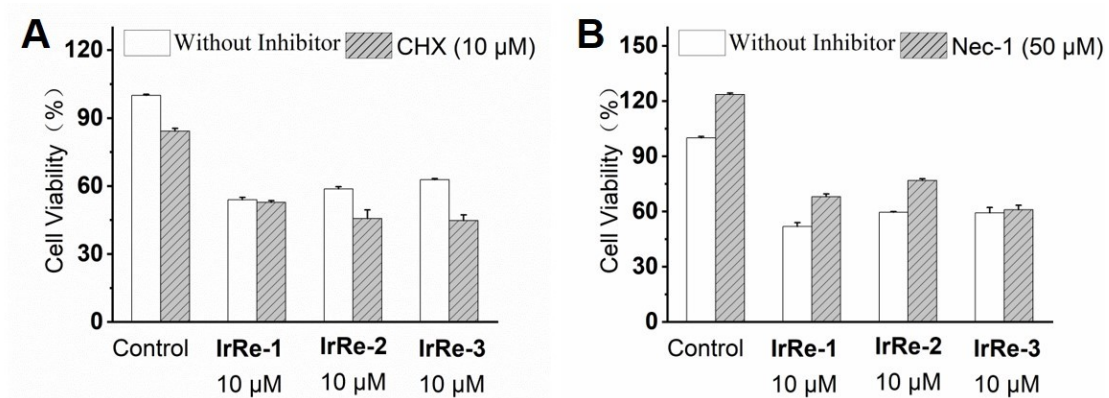

**Fig. S15** Cell viability of HeLa treated with **IrRe-1–3** in the presence or absence of CHX (A) or Nec-1 (B) for 24 h.

**Table S1** Photophysical data of **IrRe-1–3**

| Compounds     | Medium                          | $\lambda_{\text{abs, max}}$ (nm) | $\lambda_{\text{em, max}}$ (nm) |
|---------------|---------------------------------|----------------------------------|---------------------------------|
| <b>IrRe-1</b> | PBS                             | 380                              | 568                             |
|               | CH <sub>3</sub> CN              | 391                              | 570                             |
|               | CH <sub>2</sub> Cl <sub>2</sub> | 384                              | 540                             |
| <b>IrRe-2</b> | PBS                             | 378                              | 576                             |
|               | CH <sub>3</sub> CN              | 391                              | 576                             |
|               | CH <sub>2</sub> Cl <sub>2</sub> | 386                              | 572                             |
| <b>IrRe-3</b> | PBS                             | 379                              | 607                             |
|               | CH <sub>3</sub> CN              | 391                              | 610                             |
|               | CH <sub>2</sub> Cl <sub>2</sub> | 378                              | 590                             |

**Table S2** The emission quantum yields of compounds

| Compounds     | Medium                          | $\Phi_{em}^a$ |
|---------------|---------------------------------|---------------|
| <b>IrRe-1</b> | PBS                             | 0.004         |
|               | CH <sub>3</sub> CN              | 0.009         |
|               | CH <sub>2</sub> Cl <sub>2</sub> | 0.213         |
| <b>IrRe-2</b> | PBS                             | 0.001         |
|               | CH <sub>3</sub> CN              | 0.004         |
|               | CH <sub>2</sub> Cl <sub>2</sub> | 0.069         |
| <b>IrRe-3</b> | PBS                             | 0.005         |
|               | CH <sub>3</sub> CN              | 0.008         |
|               | CH <sub>2</sub> Cl <sub>2</sub> | 0.109         |
| <b>Ir-1</b>   | PBS                             | 0.026         |
|               | CH <sub>3</sub> CN              | 0.014         |
|               | CH <sub>2</sub> Cl <sub>2</sub> | 0.048         |
| <b>Ir-2</b>   | PBS                             | 0.003         |
|               | CH <sub>3</sub> CN              | 0.007         |
|               | CH <sub>2</sub> Cl <sub>2</sub> | 0.017         |
| <b>Ir-3</b>   | PBS                             | 0.008         |
|               | CH <sub>3</sub> CN              | 0.027         |
|               | CH <sub>2</sub> Cl <sub>2</sub> | 0.106         |
| <b>Re-1</b>   | PBS                             | 0.108         |
|               | CH <sub>3</sub> CN              | 0.193         |
|               | CH <sub>2</sub> Cl <sub>2</sub> | 0.291         |

<sup>a</sup> Solutions of [Ru(bpy)<sub>3</sub>](PF<sub>6</sub>)<sub>2</sub> were used as the standard, PBS ( $\Phi_{em} = 0.042$ ),<sup>1</sup> CH<sub>3</sub>CN ( $\Phi_{em} = 0.062$ )<sup>2</sup> and CH<sub>2</sub>Cl<sub>2</sub> ( $\Phi_{em} = 0.059$ ).<sup>3</sup>

**Table S3** Cell-cycle analysis data of **IrRe-1–3** on HeLa cells<sup>a</sup>

| Compounds              | G0/G1      | S          | G2/M       |
|------------------------|------------|------------|------------|
| Control                | 57.1 ± 3.3 | 24.5 ± 2.1 | 18.4 ± 1.2 |
| <b>IrRe-1</b> , 3 μM   | 59.9 ± 3.2 | 15.3 ± 2.4 | 24.8 ± 2.3 |
| <b>IrRe-1</b> , 4.5 μM | 66.4 ± 3.1 | 5.4 ± 1.1  | 28.2 ± 1.2 |
| <b>IrRe-1</b> , 6 μM   | 66.6 ± 2.8 | 4.8 ± 1.2  | 28.6 ± 1.3 |
| <b>IrRe-2</b> , 4 μM   | 44.6 ± 3.3 | 41.0 ± 3.7 | 14.4 ± 1.7 |
| <b>IrRe-2</b> , 6 μM   | 61.3 ± 2.9 | 6.4 ± 1.7  | 32.3 ± 2.5 |
| <b>IrRe-2</b> , 8 μM   | 70.7 ± 3.8 | 10.1 ± 1.9 | 19.2 ± 3.5 |
| <b>IrRe-3</b> , 3 μM   | 59.8 ± 1.4 | 26.1 ± 1.8 | 13.9 ± 3.9 |
| <b>IrRe-3</b> , 4.5 μM | 61.8 ± 3.7 | 5.3 ± 0.8  | 32.8 ± 2.3 |
| <b>IrRe-3</b> , 6 μM   | 82.6 ± 6.3 | 14.4 ± 1.6 | 3.0 ± 0.7  |

<sup>a</sup> Data shown are mean ± SD of three independent experiments for each treatment.

### Supporting References

- 1 J. Van Houten and R. J. Watts, *J. Am. Chem. Soc.*, 1976, **98**, 4853-4858.
- 2 D. S. Tyson and F. N. Castellano, *J. Phys. Chem. A*, 1999, **103**, 10955-10960.
- 3 D. Pucci, A. Bellusci, A. Crispini, M. Ghedini, N. Godbert, E. I. Szerb and A. M. Talarico, *J. Mater. Chem.*, 2009, **19**, 7643-7649.
